# Supplementary material
Source: PubMed Central journal article supplement (PMC3154117)

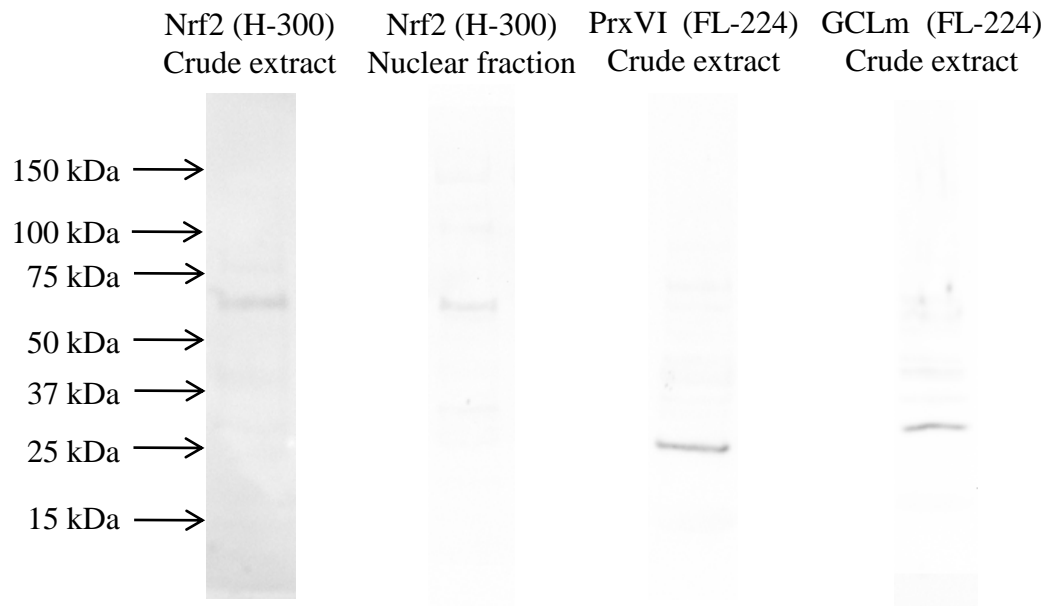

Supplement: supp_214.17.2903_JEB057935FigS1.pdf [file supp_214.17.2903_JEB057935FigS1.pdf]
